# Supplementary material
Source: PubMed Central journal article supplement (PMC6470017)
Supplement: NIHMS1506821-supplement-1.pdf [file NIHMS1506821-supplement-1.pdf]

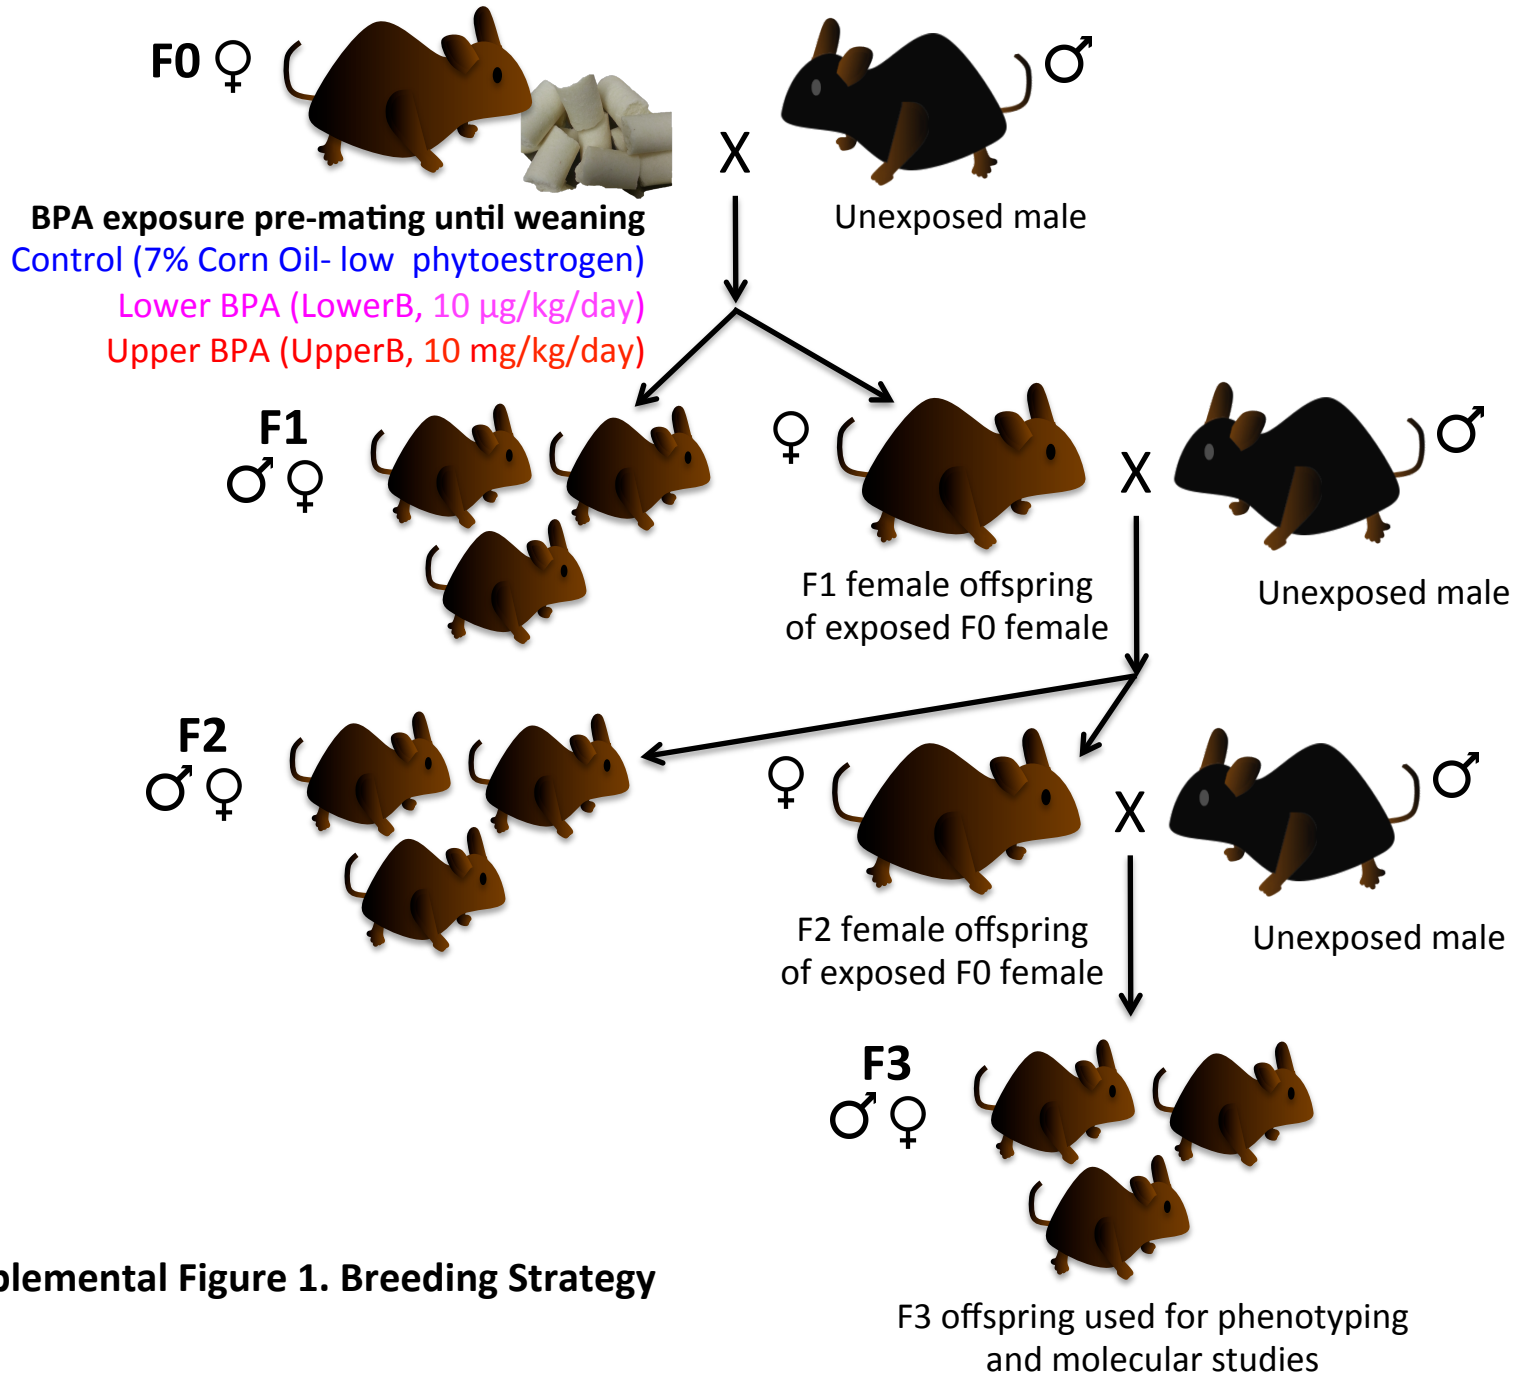

Supplemental Figure 1. Breeding Strategy

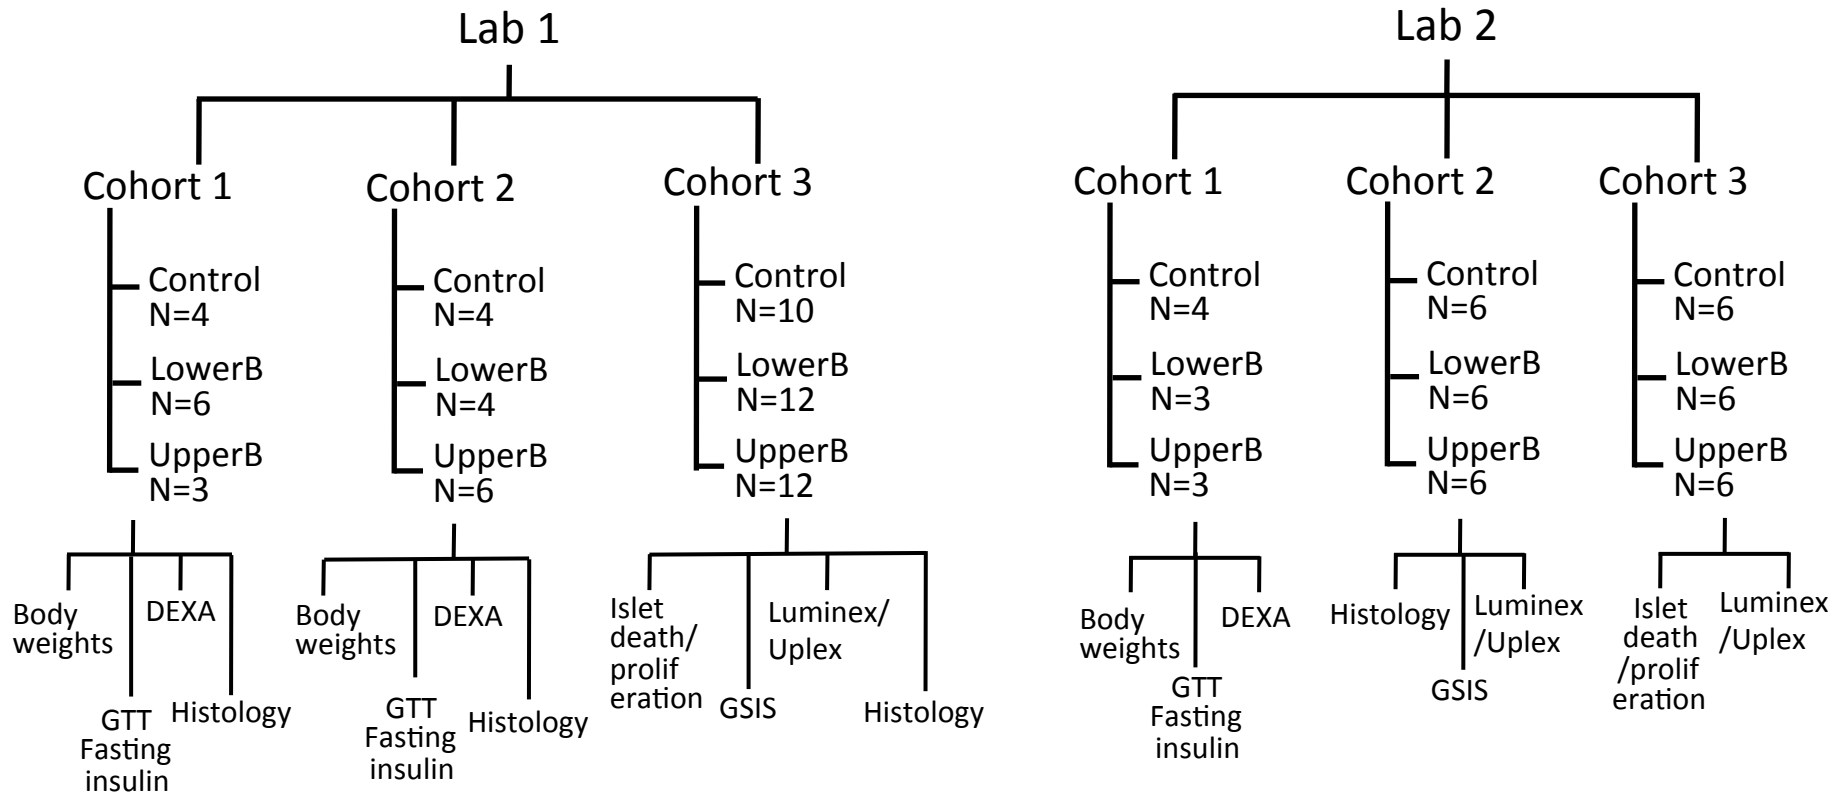

**Supplemental Figure 2. Flowchart of animal usage from multiple cohorts generated in two different animal care facilities.** N are number of litters. 2 to 4 male offspring and 2 to 4 female offspring per litter. GSIS: glucose stimulated insulin secretion.

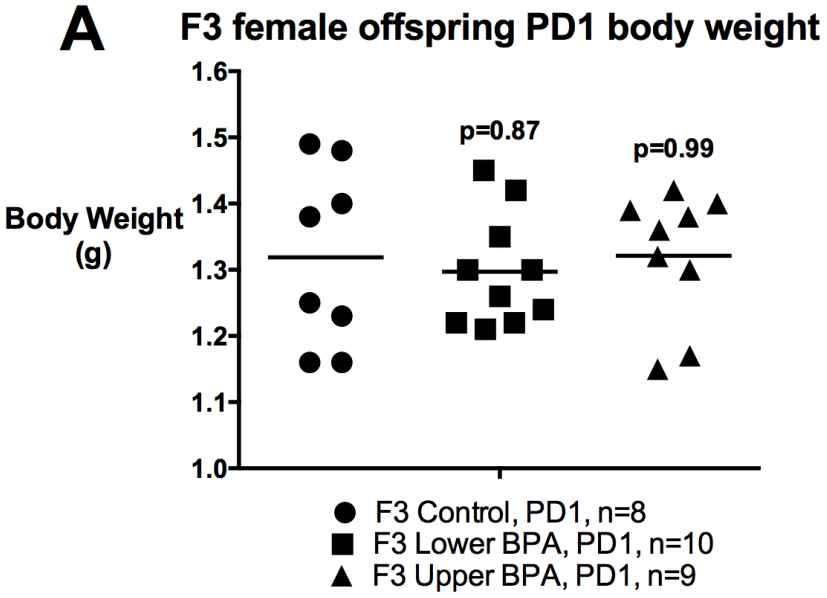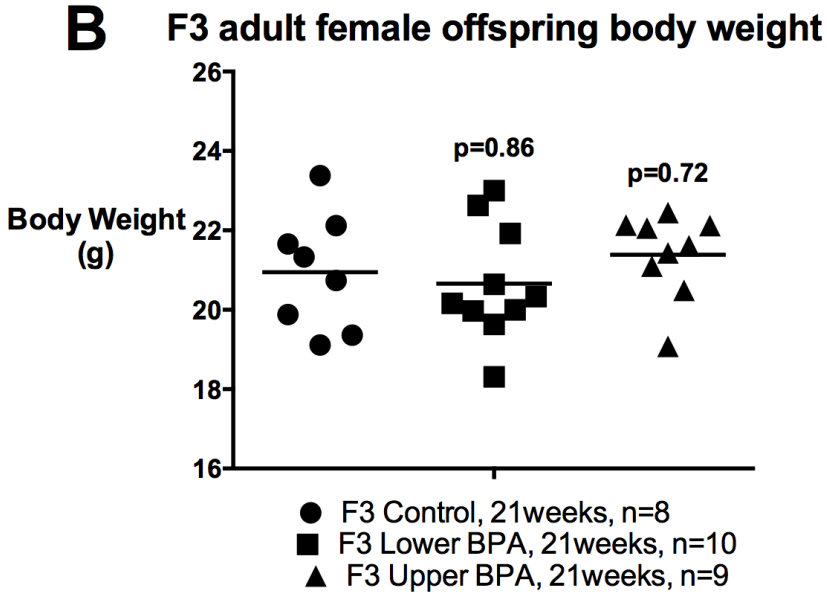

**Supplemental Figure 3. Postnatal body weight of F3 female offspring. A)** Postnatal day (PD) 1 body weight, and **B)** Body weight at 21 weeks of age. Data are individual litter data (n=8-10 litters per group) with mean superimposed, and analysed using Dunnett’s test. P values are relative to Control.

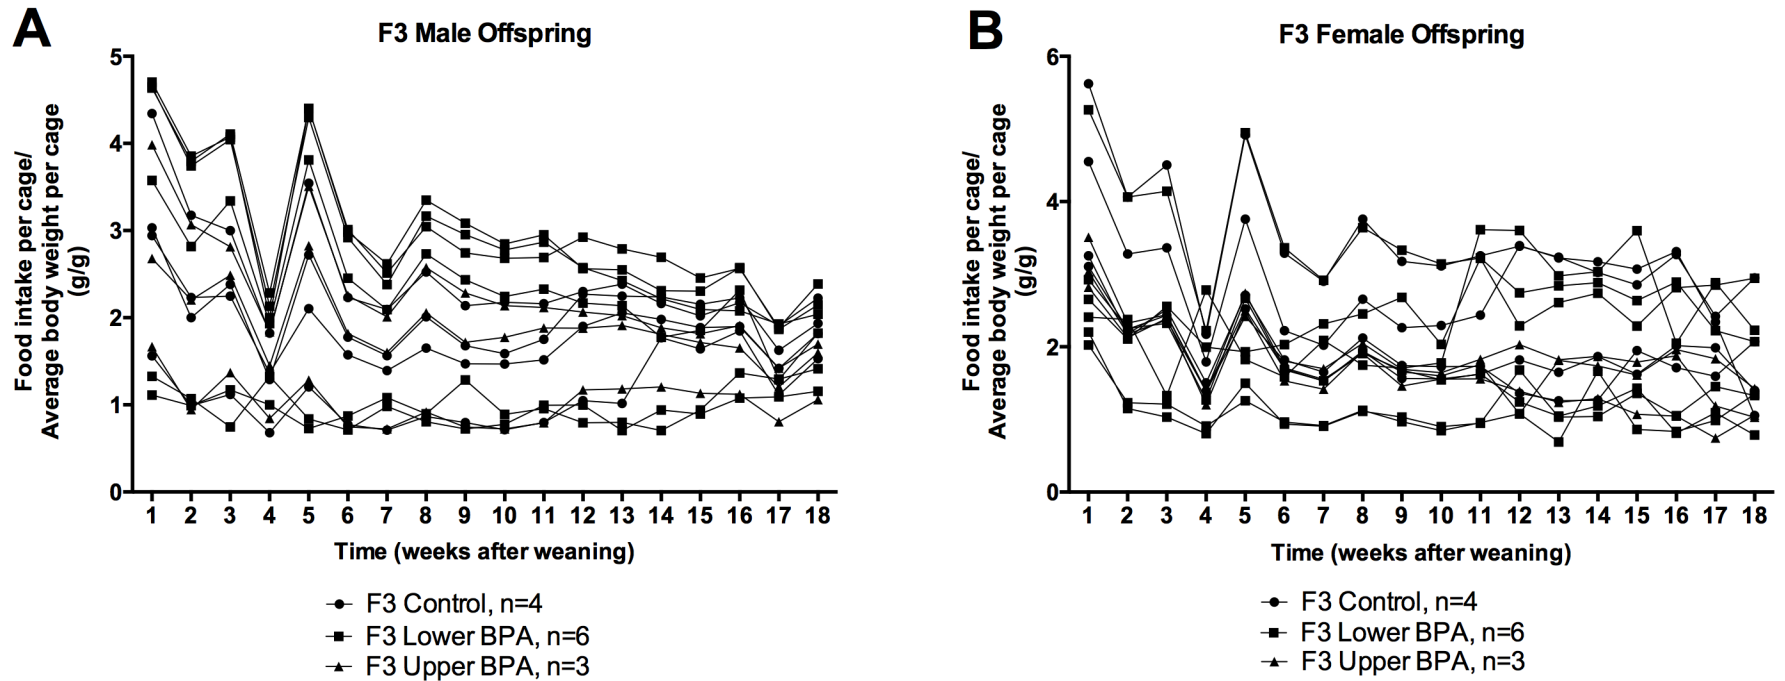

**Supplemental Figure 4. Weekly food intake from weaning to 21 weeks of age. A) F3 male offspring, and B) F3 female offspring.**

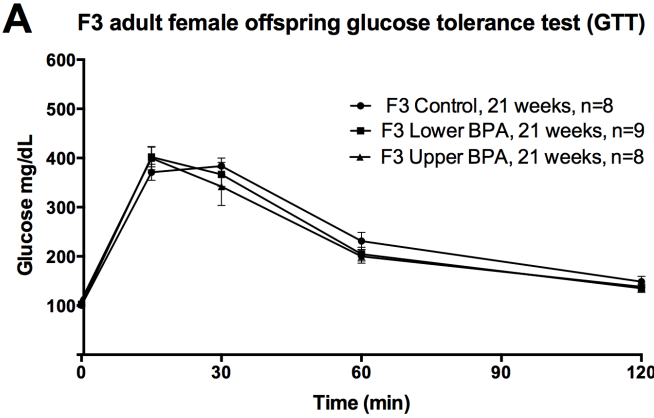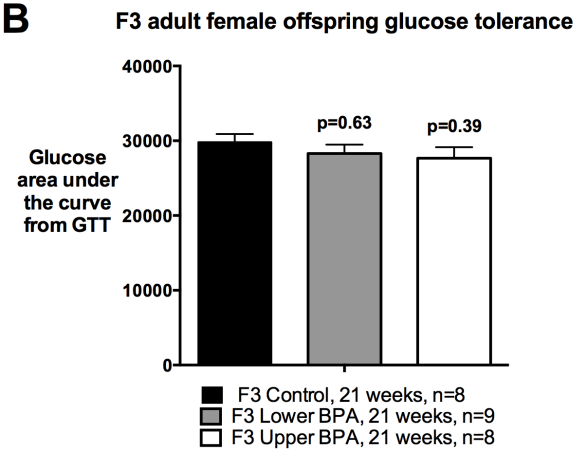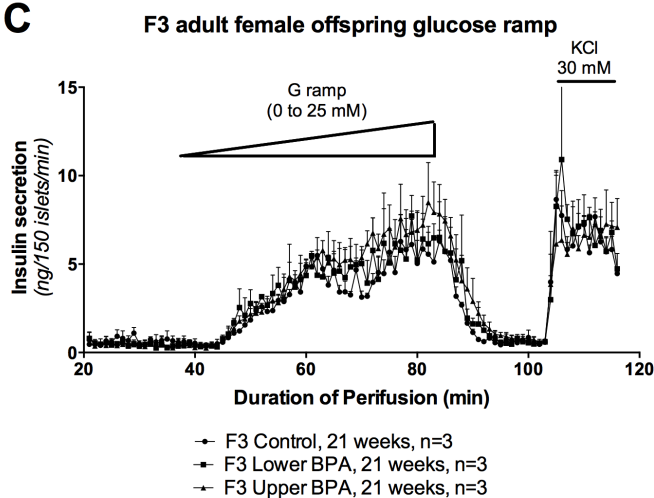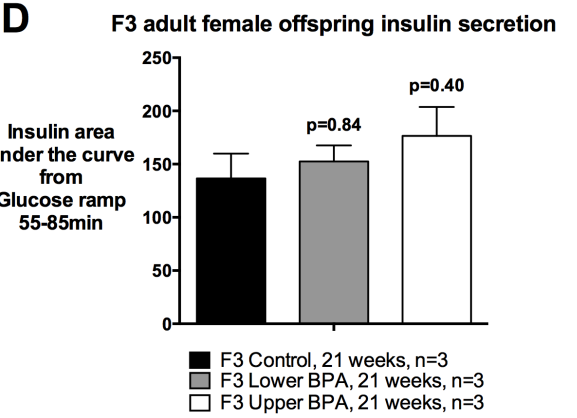

**Supplemental Figure 5. Glucose tolerance test, and insulin secretion in F3 adult female offspring. A)** Curve from glucose tolerance test, **B)** Glucose area under the curve from the glucose tolerance test, **C)** Insulin secretion on islet perfusion with increasing concentration of glucose (from 0 to 25 mM) on a glucose ramp, potassium chloride (KCl) used as a depolarizing positive control, and **D)** Glucose stimulated insulin secretion determined as insulin area under the curve from time 55 to 85 min of the glucose ramp. Data are individual litter data (one animal per litter; n=8-9 litters GTT; n=3 litters islet perfusion), and presented as mean + SEM, and analysed using Dunnett’s test. P values are relative to Control.

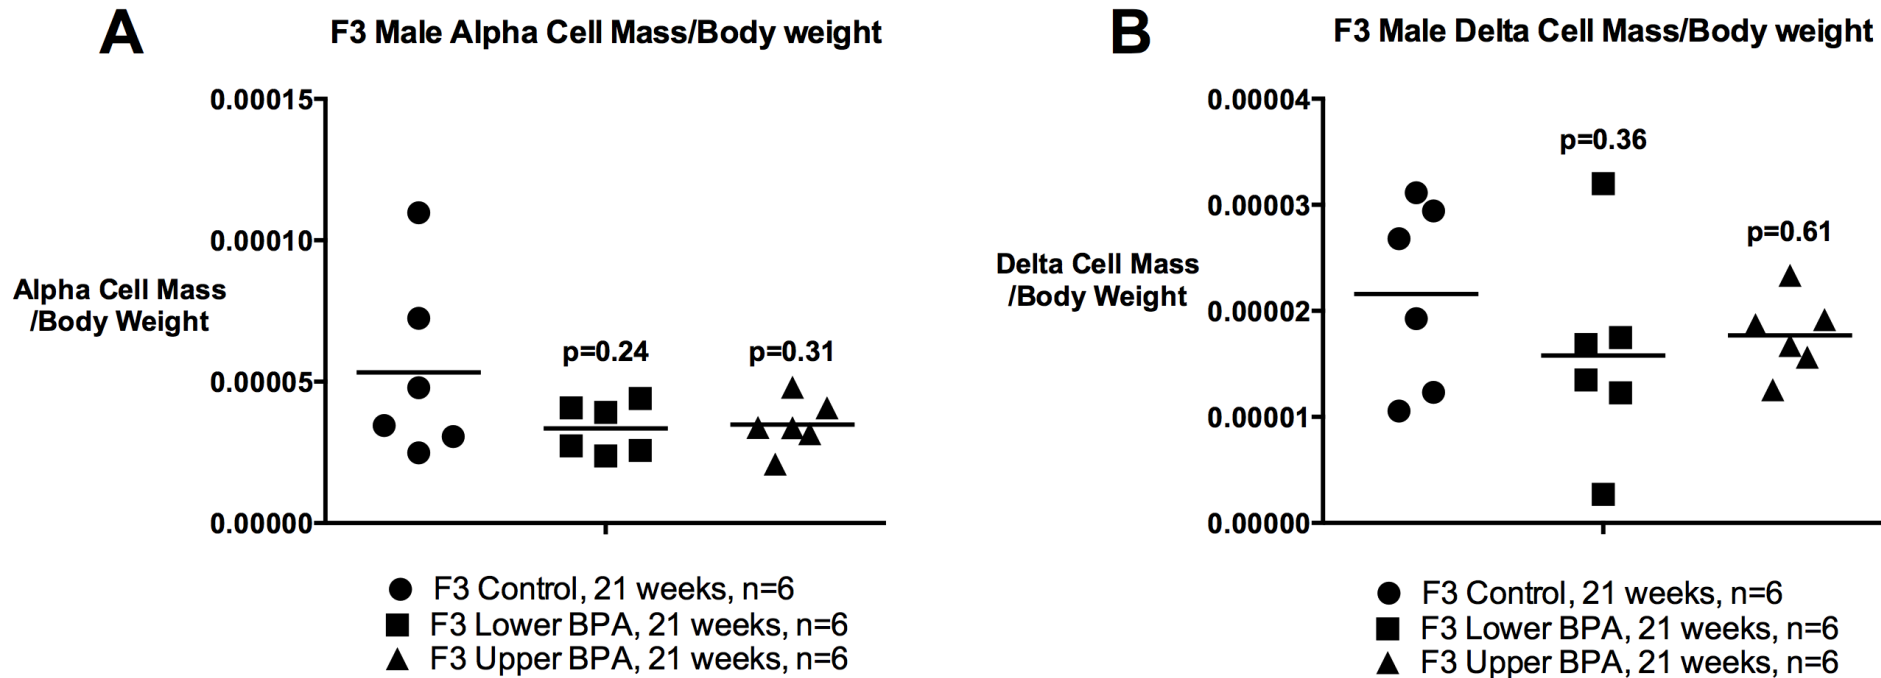

**Supplemental Figure 6. Alpha and Delta mass adjusted for body weight in F3 adult male offspring:** (A) Alpha cell mass adjusted for body weight, and (B) Delta cell mass adjusted for body weight. Data are individual litter data (one animal per litter) with mean superimposed. Data were log transformed where required (alpha cell mass adjusted for body weight) and analyzed using Dunnett's-test. P values are relative to Control.

**Supplemental Table 1.** Antibodies used for immunohistochemical and immunofluorescence staining.

| Peptide/protein target                              | Name of Antibody                                                         | Manufacturer, catalog #, and/or name of individual providing the antibody | Species raised in; monoclonal or polyclonal | Dilution used                 |
|-----------------------------------------------------|--------------------------------------------------------------------------|---------------------------------------------------------------------------|---------------------------------------------|-------------------------------|
| F4/80                                               | Mouse F4/80                                                              | Life technologies; Cat# MF48000                                           | Rat; monoclonal (BM8)                       | 1:50                          |
| CD3                                                 | CD3-ε- (M-20)                                                            | Santa Cruz; Cat# sc-1127                                                  | Goat; polyclonal                            | 1:250                         |
| Gamma Immunoglobins Heavy and Light chains          | Biotinylated Anti-Goat IgG (H+L)                                         | Vector Laboratories; Cat# BA 5000                                         | Rabbit                                      | 1:200                         |
| Gamma Immunoglobins Heavy and Light chains          | Biotinylated Anti-Rat IgG (H+L)                                          | Vector Laboratories; Cat# BA 4001                                         | Rabbit                                      | 1:200                         |
| Insulin                                             | Anti-Insulin                                                             | Dako; Cat# A0564                                                          | Guinea pig; polyclonal                      | 1:100 (PD7); 1:50 (21 weeks)  |
| Glucagon                                            | Anti-glucagon                                                            | BioGenex; PU039-5UP                                                       | Rabbit; polyclonal                          | 1:50                          |
| Somatostatin                                        | Anti-somatostatin                                                        | BioRad; Cat#8330-0009                                                     | Rat; monoclonal (YC7)                       | 1:50                          |
| Ki67                                                | Anti-Ki67                                                                | Abcam; Cat#ab16667                                                        | Rabbit; monoclonal (SP6)                    | 1:50                          |
| DAPI 4',6-Diamidine-2'-phenylindole dihydrochloride | DAPI                                                                     | Sigma; Cat# D9542-5MG                                                     |                                             | 0.5 µg/mL                     |
| Gamma Immunoglobins Heavy and Light chains          | Anti-Rabbit IgG (H+L) secondary antibody, Alexa Fluor® 488 conjugate     | Life technologies; Cat# A-11034                                           | Goat                                        | 5 µg/mL                       |
| Gamma Immunoglobins Heavy and Light chains          | Anti-Guinea pig IgG (H+L) secondary antibody, Alexa Fluor® 594 conjugate | Life technologies; Cat# A-11076                                           | Goat                                        | 5 µg/mL(PD7); 1:200 (21weeks) |
| Gamma Immunoglobins Heavy and Light chains          | Anti-Rat IgG (H+L) secondary antibody, Alexa Fluor® 488 conjugate        | Life technologies; Cat#A-11006                                            | Goat                                        | 1:200                         |
| Gamma Immunoglobins Heavy and Light chains          | Anti-Rabbit IgG (H+L) secondary antibody, Alexa Fluor® 647 conjugate     | Life technologies; Cat# A-21245                                           | Goat                                        | 1:200                         |
